# Supplementary material
Source: bioRxiv or medRxiv preprint supplement (https://medrxiv.org/content/medrxiv/early/2021/04/20/2021.04.15.21255495/DC1/embed/media-1.pdf)
Supplement: Supplementary file [file media-1.pdf]

## Supplementary Material

## Complete case analyses

Supplementary Table 1. *Demographic characteristics of the sample at baseline and percentage of the sample with depression at baseline according to demographic characteristics, for complete cases only.*

|                              | Overall | Depression |     |
|------------------------------|---------|------------|-----|
|                              |         | No         | Yes |
| <b>Gender</b>                |         |            |     |
| Women                        | 54%     | 78%        | 22% |
| Men                          | 46%     | 84%        | 16% |
| <b>Race/ethnicity</b>        |         |            |     |
| White                        | 86%     | 82%        | 18% |
| Black                        | 9%      | 71%        | 29% |
| Other                        | 5%      | 69%        | 31% |
| <b>Education</b>             |         |            |     |
| None                         | 13%     | 65%        | 35% |
| High School                  | 54%     | 79%        | 21% |
| College                      | 22%     | 87%        | 13% |
| Postgraduate                 | 11%     | 90%        | 10% |
| <b>Age</b>                   |         |            |     |
| 50-59                        | 36%     | 78%        | 22% |
| 60-69                        | 34%     | 84%        | 16% |
| 70-79                        | 19%     | 81%        | 19% |
| ≥80                          | 11%     | 77%        | 23% |
| <b>Marital status</b>        |         |            |     |
| Married                      | 64%     | 85%        | 15% |
| Unmarried                    | 36%     | 72%        | 28% |
| <b>Employment status</b>     |         |            |     |
| Employed                     | 42%     | 87%        | 13% |
| Not working                  | 13%     | 61%        | 39% |
| Retired                      | 45%     | 83%        | 17% |
| <b>Household income</b>      |         |            |     |
| <\$19,000                    | 18%     | 63%        | 37% |
| \$19,000-\$39,999            | 23%     | 77%        | 23% |
| \$40,000-\$79,999            | 28%     | 84%        | 16% |
| ≥\$80,000                    | 31%     | 90%        | 10% |
| <b>Neighborhood safety</b>   |         |            |     |
| Excellent/good               | 92%     | 82%        | 18% |
| Fair/poor                    | 8%      | 61%        | 39% |
| <b>Social network</b>        |         |            |     |
| Less diverse                 | 46%     | 73%        | 27% |
| More diverse                 | 54%     | 86%        | 14% |
| <b>Difficulty with ADLs</b>  |         |            |     |
| None                         | 86%     | 85%        | 15% |
| One or more                  | 14%     | 50%        | 50% |
| <b>Difficulty with IADLs</b> |         |            |     |
| None                         | 88%     | 85%        | 15% |
| One or more                  | 12%     | 46%        | 54% |
| <b>Long-term conditions</b>  |         |            |     |
| None                         | 14%     | 88%        | 12% |
| One or more                  | 86%     | 79%        | 21% |
| <b>Cognition (quartiles)</b> |         |            |     |
| 0                            | 19%     | 70%        | 30% |
| 1                            | 32%     | 79%        | 21% |
| 2                            | 25%     | 84%        | 16% |
| 3                            | 24%     | 86%        | 14% |

*Note.* N=11,747. Results weighted. The Other race/ethnicity category included people who identified as American Indian, Alaskan Native, Asian or Pacific Islander, Hispanic, and Other ethnicities.

Supplementary Table 2. Frequency of arts engagement at baseline, for complete cases only (n=11,747).

| Activity frequency | Reading | Writing | Baking/cooking | Sewing | Hobby | Club | Organization |
|--------------------|---------|---------|----------------|--------|-------|------|--------------|
| None               | 5%      | 61%     | 30%            | 86%    | 42%   | 63%  | 81%          |
| Monthly            | 9%      | 20%     | 29%            | 7%     | 26%   | 22%  | 15%          |
| Weekly             | 86%     | 19%     | 41%            | 7%     | 32%   | 15%  | 4%           |

Note. Results weighted.

Supplementary Table 3. Models testing associations between frequency of arts engagement and the odds of depression, for complete cases only.

|                       | Concurrent (n=16,666) |                  |                  |                   |                  |              | Longitudinal (n=14,071) |                  |                  |                   |                  |                  |
|-----------------------|-----------------------|------------------|------------------|-------------------|------------------|--------------|-------------------------|------------------|------------------|-------------------|------------------|------------------|
|                       | Model 1: Unadjusted   |                  |                  | Model 2: Adjusted |                  |              | Model 1: Unadjusted     |                  |                  | Model 2: Adjusted |                  |                  |
|                       | OR                    | 95% CI           | p value          | OR                | 95% CI           | p value      | OR                      | 95% CI           | p value          | OR                | 95% CI           | p value          |
| <b>Reading</b>        |                       |                  |                  |                   |                  |              |                         |                  |                  |                   |                  |                  |
| Monthly               | <b>0.68</b>           | <b>0.58-0.81</b> | <b>&lt;0.001</b> | 0.97              | 0.80-1.17        | 0.721        | <b>0.72</b>             | <b>0.59-0.88</b> | <b>0.001</b>     | 1.06              | 0.83-1.36        | 0.626            |
| Weekly                | <b>0.55</b>           | <b>0.48-0.64</b> | <b>&lt;0.001</b> | 0.94              | 0.81-1.10        | 0.460        | <b>0.53</b>             | <b>0.45-0.63</b> | <b>&lt;0.001</b> | 0.90              | 0.73-1.12        | 0.354            |
| <b>Writing</b>        |                       |                  |                  |                   |                  |              |                         |                  |                  |                   |                  |                  |
| Monthly               | 1.06                  | 0.96-1.17        | 0.279            | 1.01              | 0.90-1.13        | 0.891        | 0.97                    | 0.86-1.09        | 0.590            | 0.89              | 0.78-1.02        | 0.089            |
| Weekly                | 0.98                  | 0.88-1.1         | 0.746            | 0.99              | 0.87-1.12        | 0.882        | 1.02                    | 0.9-1.15         | 0.754            | 1.00              | 0.86-1.16        | 0.990            |
| <b>Baking/cooking</b> |                       |                  |                  |                   |                  |              |                         |                  |                  |                   |                  |                  |
| Monthly               | 0.95                  | 0.87-1.05        | 0.337            | 0.98              | 0.87-1.09        | 0.682        | 0.95                    | 0.85-1.07        | 0.394            | <b>0.87</b>       | <b>0.76-1.00</b> | <b>0.049</b>     |
| Weekly                | <b>0.87</b>           | <b>0.78-0.96</b> | <b>0.004</b>     | 0.90              | 0.80-1.01        | 0.066        | <b>0.87</b>             | <b>0.78-0.97</b> | <b>0.016</b>     | <b>0.83</b>       | <b>0.73-0.94</b> | <b>0.005</b>     |
| <b>Sewing</b>         |                       |                  |                  |                   |                  |              |                         |                  |                  |                   |                  |                  |
| Monthly               | 1.04                  | 0.88-1.22        | 0.637            | 0.89              | 0.75-1.06        | 0.178        | <b>1.25</b>             | <b>1.05-1.48</b> | <b>0.011</b>     | 1.05              | 0.86-1.29        | 0.602            |
| Weekly                | <b>1.30</b>           | <b>1.1-1.54</b>  | <b>0.002</b>     | 1.04              | 0.87-1.25        | 0.636        | <b>1.27</b>             | <b>1.06-1.52</b> | <b>0.010</b>     | 0.91              | 0.74-1.12        | 0.373            |
| <b>Hobby</b>          |                       |                  |                  |                   |                  |              |                         |                  |                  |                   |                  |                  |
| Monthly               | <b>0.65</b>           | <b>0.59-0.71</b> | <b>&lt;0.001</b> | <b>0.83</b>       | <b>0.75-0.93</b> | <b>0.001</b> | <b>0.73</b>             | <b>0.66-0.81</b> | <b>&lt;0.001</b> | 1.02              | 0.89-1.16        | 0.782            |
| Weekly                | <b>0.64</b>           | <b>0.58-0.71</b> | <b>&lt;0.001</b> | <b>0.83</b>       | <b>0.73-0.93</b> | <b>0.001</b> | <b>0.60</b>             | <b>0.53-0.67</b> | <b>&lt;0.001</b> | <b>0.84</b>       | <b>0.73-0.96</b> | <b>0.012</b>     |
| <b>Club</b>           |                       |                  |                  |                   |                  |              |                         |                  |                  |                   |                  |                  |
| Monthly               | <b>0.71</b>           | <b>0.64-0.78</b> | <b>&lt;0.001</b> | <b>0.89</b>       | <b>0.80-0.99</b> | <b>0.037</b> | <b>0.67</b>             | <b>0.6-0.74</b>  | <b>&lt;0.001</b> | <b>0.79</b>       | <b>0.69-0.90</b> | <b>&lt;0.001</b> |
| Weekly                | <b>0.64</b>           | <b>0.56-0.72</b> | <b>&lt;0.001</b> | <b>0.83</b>       | <b>0.72-0.96</b> | <b>0.010</b> | <b>0.60</b>             | <b>0.52-0.69</b> | <b>&lt;0.001</b> | <b>0.78</b>       | <b>0.67-0.92</b> | <b>0.003</b>     |
| <b>Organization</b>   |                       |                  |                  |                   |                  |              |                         |                  |                  |                   |                  |                  |
| Monthly               | <b>0.83</b>           | <b>0.74-0.95</b> | <b>0.005</b>     | 0.92              | 0.80-1.05        | 0.202        | <b>0.82</b>             | <b>0.71-0.94</b> | <b>0.004</b>     | <b>0.84</b>       | <b>0.72-0.99</b> | <b>0.037</b>     |
| Weekly                | 1.15                  | 0.94-1.41        | 0.186            | 1.12              | 0.89-1.42        | 0.331        | 1.15                    | 0.91-1.45        | 0.257            | 1.08              | 0.82-1.42        | 0.581            |

Note. For all activities, no engagement was the reference category. In both concurrent and longitudinal analyses, model 2 was adjusted for gender, race/ethnicity, education, age, marital status, employment status, household income, neighborhood safety, social network, difficulty with ADLs and IADLs, long-term conditions, and cognition. Longitudinal model 2 was additionally adjusted for depression in the previous wave. Results weighted.

Alternative CES-D threshold to indicate depression

In our main analyses, we used a cut-off of three or more to indicate the presence of depression on the modified eight-item Center for Epidemiologic Studies Depression Scale (CES-D; Steffick, 2000; Turvey et al., 1999). A cut-off of four or more has also been used to indicate depression (Steffick, 2000), so here we have repeated the main analyses using this threshold.

Supplementary Table 4. Models testing associations between frequency of arts engagement and the odds of depression (indicated by a score of 4 or more on the CES-D).

|                       | Concurrent                        |                  |                  |                                 |                  |                  | Longitudinal                      |                  |                  |                                 |                  |              |
|-----------------------|-----------------------------------|------------------|------------------|---------------------------------|------------------|------------------|-----------------------------------|------------------|------------------|---------------------------------|------------------|--------------|
|                       | Model 1: Unadjusted<br>(n=19,276) |                  |                  | Model 2: Adjusted<br>(n=19,276) |                  |                  | Model 1: Unadjusted<br>(n=16,043) |                  |                  | Model 2: Adjusted<br>(n=16,043) |                  |              |
|                       | OR                                | 95% CI           | p value          | OR                              | 95% CI           | p value          | OR                                | 95% CI           | p value          | OR                              | 95% CI           | p value      |
| <b>Reading</b>        |                                   |                  |                  |                                 |                  |                  |                                   |                  |                  |                                 |                  |              |
| Monthly               | <b>0.73</b>                       | <b>0.62-0.86</b> | <b>&lt;0.001</b> | 1.00                            | 0.83-1.20        | 0.970            | <b>0.72</b>                       | <b>0.60-0.87</b> | <b>0.001</b>     | 1.03                            | 0.82-1.30        | 0.782        |
| Weekly                | <b>0.54</b>                       | <b>0.47-0.62</b> | <b>&lt;0.001</b> | 0.93                            | 0.80-1.08        | 0.322            | <b>0.47</b>                       | <b>0.40-0.55</b> | <b>&lt;0.001</b> | <b>0.80</b>                     | <b>0.66-0.98</b> | <b>0.027</b> |
| <b>Writing</b>        |                                   |                  |                  |                                 |                  |                  |                                   |                  |                  |                                 |                  |              |
| Monthly               | <b>1.14</b>                       | <b>1.03-1.27</b> | <b>0.015</b>     | 1.11                            | 0.98-1.25        | 0.092            | 0.98                              | 0.87-1.11        | 0.777            | 0.87                            | 0.75-1.00        | 0.056        |
| Weekly                | 1.10                              | 0.98-1.23        | 0.102            | 1.09                            | 0.96-1.24        | 0.169            | 0.99                              | 0.87-1.13        | 0.880            | 0.93                            | 0.80-1.09        | 0.377        |
| <b>Baking/cooking</b> |                                   |                  |                  |                                 |                  |                  |                                   |                  |                  |                                 |                  |              |
| Monthly               | <b>0.89</b>                       | <b>0.81-0.99</b> | <b>0.031</b>     | 0.93                            | 0.83-1.04        | 0.214            | 0.92                              | 0.82-1.03        | 0.162            | 0.92                            | 0.80-1.05        | 0.209        |
| Weekly                | <b>0.82</b>                       | <b>0.75-0.91</b> | <b>&lt;0.001</b> | <b>0.89</b>                     | <b>0.79-1.00</b> | <b>0.049</b>     | <b>0.84</b>                       | <b>0.74-0.94</b> | <b>0.002</b>     | <b>0.82</b>                     | <b>0.72-0.94</b> | <b>0.005</b> |
| <b>Sewing</b>         |                                   |                  |                  |                                 |                  |                  |                                   |                  |                  |                                 |                  |              |
| Monthly               | <b>1.19</b>                       | <b>1.01-1.40</b> | <b>0.041</b>     | 1.01                            | 0.84-1.21        | 0.911            | 1.20                              | 0.99-1.45        | 0.059            | 0.96                            | 0.76-1.20        | 0.694        |
| Weekly                | <b>1.31</b>                       | <b>1.10-1.57</b> | <b>0.002</b>     | 1.03                            | 0.86-1.25        | 0.725            | <b>1.24</b>                       | <b>1.01-1.51</b> | <b>0.038</b>     | 0.86                            | 0.68-1.07        | 0.182        |
| <b>Hobby</b>          |                                   |                  |                  |                                 |                  |                  |                                   |                  |                  |                                 |                  |              |
| Monthly               | <b>0.61</b>                       | <b>0.55-0.68</b> | <b>&lt;0.001</b> | <b>0.79</b>                     | <b>0.70-0.89</b> | <b>&lt;0.001</b> | <b>0.69</b>                       | <b>0.62-0.78</b> | <b>&lt;0.001</b> | 0.97                            | 0.84-1.12        | 0.677        |
| Weekly                | <b>0.62</b>                       | <b>0.55-0.69</b> | <b>&lt;0.001</b> | <b>0.81</b>                     | <b>0.72-0.92</b> | <b>0.001</b>     | <b>0.60</b>                       | <b>0.53-0.68</b> | <b>&lt;0.001</b> | <b>0.86</b>                     | <b>0.74-0.99</b> | <b>0.040</b> |
| <b>Club</b>           |                                   |                  |                  |                                 |                  |                  |                                   |                  |                  |                                 |                  |              |
| Monthly               | <b>0.63</b>                       | <b>0.57-0.70</b> | <b>&lt;0.001</b> | <b>0.80</b>                     | <b>0.71-0.90</b> | <b>&lt;0.001</b> | <b>0.66</b>                       | <b>0.58-0.74</b> | <b>&lt;0.001</b> | <b>0.84</b>                     | <b>0.73-0.97</b> | <b>0.019</b> |
| Weekly                | <b>0.54</b>                       | <b>0.47-0.62</b> | <b>&lt;0.001</b> | <b>0.70</b>                     | <b>0.60-0.83</b> | <b>&lt;0.001</b> | <b>0.60</b>                       | <b>0.52-0.70</b> | <b>&lt;0.001</b> | <b>0.83</b>                     | <b>0.70-0.99</b> | <b>0.036</b> |
| <b>Organization</b>   |                                   |                  |                  |                                 |                  |                  |                                   |                  |                  |                                 |                  |              |
| Monthly               | 0.89                              | 0.78-1.02        | 0.091            | 0.97                            | 0.83-1.12        | 0.639            | <b>0.79</b>                       | <b>0.69-0.92</b> | <b>0.002</b>     | <b>0.84</b>                     | <b>0.71-1.00</b> | <b>0.049</b> |
| Weekly                | 1.12                              | 0.91-1.39        | 0.288            | 1.08                            | 0.85-1.38        | 0.506            | 1.17                              | 0.92-1.49        | 0.190            | 1.17                            | 0.89-1.54        | 0.252        |

*Note.* For all activities, no engagement was the reference category. In both concurrent and longitudinal analyses, model 2 was adjusted for gender, race/ethnicity, education, age, marital status, employment status, household income, neighborhood safety, social network, difficulty with ADLs and IADLs, long-term conditions, and cognition. Longitudinal model 2 was additionally adjusted for depression in the previous wave. Results weighted and based on 20 multiply imputed data sets.

Complementary measure of depression

In addition to the CES-D, HRS included another measure of depression in every wave, the Short Form Composite International Diagnostic Interview (CIDI-SF). This scale can be used to determine a probable diagnosis of a major depressive episode according to DSM criteria (Nelson et al., 1998; Steffick, 2000). Respondents are asked screening questions about depressed mood and anhedonia and, if they meet criteria for the intensity and duration of depressed mood or anhedonia experienced, they then respond to seven specific symptom questions. By summing responses to these questions, total possible score ranges from 0 to 7, and a score of three or more is indicative of a diagnosis of depression (Nelson et al., 1998; Steffick, 2000).

Supplementary Table 5. Models testing associations between frequency of arts engagement and the odds of depression (indicated by a score of 3 or more on the CIDI).

|                       | Concurrent                        |                  |                  |                                 |                  |              | Longitudinal                      |                  |                  |                                 |                  |              |
|-----------------------|-----------------------------------|------------------|------------------|---------------------------------|------------------|--------------|-----------------------------------|------------------|------------------|---------------------------------|------------------|--------------|
|                       | Model 1: Unadjusted<br>(n=19,274) |                  |                  | Model 2: Adjusted<br>(n=19,274) |                  |              | Model 1: Unadjusted<br>(n=16,042) |                  |                  | Model 2: Adjusted<br>(n=16,042) |                  |              |
|                       | OR                                | 95% CI           | p value          | OR                              | 95% CI           | p value      | OR                                | 95% CI           | p value          | OR                              | 95% CI           | p value      |
| <b>Reading</b>        |                                   |                  |                  |                                 |                  |              |                                   |                  |                  |                                 |                  |              |
| Monthly               | <b>0.81</b>                       | <b>0.66-0.99</b> | <b>0.039</b>     | 0.94                            | 0.75-1.17        | 0.576        | 0.92                              | 0.69-1.22        | 0.559            | 1.09                            | 0.78-1.51        | 0.614        |
| Weekly                | <b>0.64</b>                       | <b>0.54-0.76</b> | <b>&lt;0.001</b> | 0.89                            | 0.73-1.08        | 0.227        | <b>0.75</b>                       | <b>0.60-0.95</b> | <b>0.015</b>     | 1.08                            | 0.82-1.41        | 0.582        |
| <b>Writing</b>        |                                   |                  |                  |                                 |                  |              |                                   |                  |                  |                                 |                  |              |
| Monthly               | <b>1.14</b>                       | <b>1.01-1.30</b> | <b>0.041</b>     | 1.06                            | 0.92-1.22        | 0.399        | 1.12                              | 0.96-1.31        | 0.149            | 1.01                            | 0.85-1.20        | 0.879        |
| Weekly                | <b>1.18</b>                       | <b>1.03-1.35</b> | <b>0.015</b>     | 1.08                            | 0.93-1.24        | 0.332        | <b>1.24</b>                       | <b>1.05-1.46</b> | <b>0.011</b>     | 1.15                            | 0.96-1.37        | 0.131        |
| <b>Baking/cooking</b> |                                   |                  |                  |                                 |                  |              |                                   |                  |                  |                                 |                  |              |
| Monthly               | 1.01                              | 0.89-1.13        | 0.917            | 0.92                            | 0.80-1.05        | 0.192        | 0.97                              | 0.83-1.13        | 0.716            | 0.93                            | 0.78-1.10        | 0.385        |
| Weekly                | <b>0.87</b>                       | <b>0.77-0.98</b> | <b>0.023</b>     | <b>0.80</b>                     | <b>0.70-0.92</b> | <b>0.002</b> | <b>0.81</b>                       | <b>0.70-0.95</b> | <b>0.007</b>     | <b>0.80</b>                     | <b>0.67-0.95</b> | <b>0.012</b> |
| <b>Sewing</b>         |                                   |                  |                  |                                 |                  |              |                                   |                  |                  |                                 |                  |              |
| Monthly               | <b>1.23</b>                       | <b>1.01-1.49</b> | <b>0.038</b>     | 1.05                            | 0.86-1.28        | 0.651        | <b>1.34</b>                       | <b>1.07-1.67</b> | <b>0.012</b>     | 1.03                            | 0.80-1.33        | 0.800        |
| Weekly                | <b>1.35</b>                       | <b>1.11-1.65</b> | <b>0.003</b>     | 1.10                            | 0.89-1.36        | 0.375        | 1.19                              | 0.93-1.51        | 0.168            | 0.89                            | 0.68-1.16        | 0.386        |
| <b>Hobby</b>          |                                   |                  |                  |                                 |                  |              |                                   |                  |                  |                                 |                  |              |
| Monthly               | <b>0.86</b>                       | <b>0.76-0.97</b> | <b>0.014</b>     | 0.99                            | 0.86-1.13        | 0.891        | <b>0.85</b>                       | <b>0.73-0.99</b> | <b>0.037</b>     | 1.02                            | 0.85-1.22        | 0.829        |
| Weekly                | <b>0.84</b>                       | <b>0.74-0.96</b> | <b>0.008</b>     | 0.98                            | 0.85-1.14        | 0.827        | 0.87                              | 0.74-1.01        | 0.073            | 1.08                            | 0.90-1.29        | 0.420        |
| <b>Club</b>           |                                   |                  |                  |                                 |                  |              |                                   |                  |                  |                                 |                  |              |
| Monthly               | <b>0.71</b>                       | <b>0.62-0.80</b> | <b>&lt;0.001</b> | <b>0.83</b>                     | <b>0.72-0.95</b> | <b>0.007</b> | <b>0.66</b>                       | <b>0.56-0.77</b> | <b>&lt;0.001</b> | <b>0.79</b>                     | <b>0.66-0.95</b> | <b>0.013</b> |
| Weekly                | <b>0.64</b>                       | <b>0.54-0.75</b> | <b>&lt;0.001</b> | <b>0.77</b>                     | <b>0.65-0.91</b> | <b>0.003</b> | <b>0.60</b>                       | <b>0.50-0.72</b> | <b>&lt;0.001</b> | <b>0.70</b>                     | <b>0.57-0.86</b> | <b>0.001</b> |
| <b>Organization</b>   |                                   |                  |                  |                                 |                  |              |                                   |                  |                  |                                 |                  |              |
| Monthly               | <b>0.82</b>                       | <b>0.70-0.96</b> | <b>0.011</b>     | 0.87                            | 0.74-1.03        | 0.108        | <b>0.80</b>                       | <b>0.66-0.97</b> | <b>0.020</b>     | 0.87                            | 0.71-1.07        | 0.196        |
| Weekly                | 1.04                              | 0.80-1.34        | 0.787            | 1.02                            | 0.76-1.36        | 0.902        | 1.18                              | 0.90-1.55        | 0.239            | 1.23                            | 0.91-1.66        | 0.180        |

Note. For all activities, no engagement was the reference category. In both concurrent and longitudinal analyses, model 2 was adjusted for gender, race/ethnicity, education, age, marital status, employment status, household income, neighborhood safety, social network, difficulty with ADLs and IADLs, long-term conditions, and cognition. Longitudinal model 2 was additionally adjusted for depression in the previous wave. Results weighted and based on 20 multiply imputed data sets.

Inclusion of 2018 HRS data

In our main analyses, we used data from HRS waves at which the frequency of arts engagement was consistently measured, and complete data were available (2008-2016). An early release file also provides preliminary data from the HRS 2018 wave. This data could not be included in our main analyses because variables indicating eligibility for and completion of the Psychosocial and Lifestyle Questionnaire in 2018 were not available, and neither were weights to account for non-response to the Psychosocial and Lifestyle questionnaire in 2018. However, as our main analyses used HRS weights for the first year in which participants completed the Psychosocial and Lifestyle questionnaire, we were able to include individuals who participated in 2018 and had also participated in the Psychosocial and Lifestyle questionnaire in a previous year. Concurrent models included arts engagement and depression measured simultaneously, with estimates averaged across all waves (2008-2018). In longitudinal models, exposures (arts engagement) were included from 2008 to 2016, with the outcome (depression) included from 2010 to 2018.

Data on difficulties with ADLS and IADLS and cognition were not available in 2018. For these analyses, confounders were thus limited to gender, race/ethnicity, education, age, marital status, employment status, household income, neighborhood safety, social network, and long-term conditions (as well as depression in the previous wave for longitudinal analyses).

Supplementary Table 6. *Models testing associations between frequency of arts engagement and the odds of depression (indicated by a score of 3 or more on the CES-D) including data from the 2018 HRS wave.*

|                       | Concurrent                        |                  |                  |                                 |                  |                  | Longitudinal                      |                  |                  |                                 |                  |                  |
|-----------------------|-----------------------------------|------------------|------------------|---------------------------------|------------------|------------------|-----------------------------------|------------------|------------------|---------------------------------|------------------|------------------|
|                       | Model 1: Unadjusted<br>(n=19,176) |                  |                  | Model 2: Adjusted<br>(n=19,176) |                  |                  | Model 1: Unadjusted<br>(n=15,952) |                  |                  | Model 2: Adjusted<br>(n=15,952) |                  |                  |
|                       | OR                                | 95% CI           | p value          | OR                              | 95% CI           | p value          | OR                                | 95% CI           | p value          | OR                              | 95% CI           | p value          |
| <b>Reading</b>        |                                   |                  |                  |                                 |                  |                  |                                   |                  |                  |                                 |                  |                  |
| Monthly               | <b>0.70</b>                       | <b>0.62-0.80</b> | <b>&lt;0.001</b> | <b>0.85</b>                     | <b>0.74-0.99</b> | <b>0.034</b>     | <b>0.72</b>                       | <b>0.62-0.83</b> | <b>&lt;0.001</b> | 0.94                            | 0.78-1.14        | 0.544            |
| Weekly                | <b>0.56</b>                       | <b>0.49-0.62</b> | <b>&lt;0.001</b> | <b>0.77</b>                     | <b>0.68-0.87</b> | <b>&lt;0.001</b> | <b>0.54</b>                       | <b>0.47-0.62</b> | <b>&lt;0.001</b> | <b>0.80</b>                     | <b>0.68-0.95</b> | <b>0.009</b>     |
| <b>Writing</b>        |                                   |                  |                  |                                 |                  |                  |                                   |                  |                  |                                 |                  |                  |
| Monthly               | 1.05                              | 0.97-1.14        | 0.257            | 1.04                            | 0.95-1.14        | 0.374            | 0.97                              | 0.88-1.06        | 0.506            | 0.91                            | 0.81-1.02        | 0.114            |
| Weekly                | 1.00                              | 0.91-1.10        | 0.968            | 1.03                            | 0.93-1.14        | 0.598            | 1.03                              | 0.93-1.14        | 0.632            | 1.03                            | 0.91-1.17        | 0.627            |
| <b>Baking/cooking</b> |                                   |                  |                  |                                 |                  |                  |                                   |                  |                  |                                 |                  |                  |
| Monthly               | 1.02                              | 0.94-1.10        | 0.651            | 0.93                            | 0.86-1.01        | 0.105            | 1.04                              | 0.95-1.13        | 0.406            | 0.95                            | 0.85-1.06        | 0.381            |
| Weekly                | <b>0.92</b>                       | <b>0.86-1.00</b> | <b>0.045</b>     | <b>0.82</b>                     | <b>0.76-0.90</b> | <b>&lt;0.001</b> | 0.96                              | 0.88-1.04        | 0.309            | <b>0.88</b>                     | <b>0.79-0.97</b> | <b>0.012</b>     |
| <b>Sewing</b>         |                                   |                  |                  |                                 |                  |                  |                                   |                  |                  |                                 |                  |                  |
| Monthly               | 1.06                              | 0.93-1.21        | 0.383            | 0.89                            | 0.78-1.03        | 0.119            | <b>1.16</b>                       | <b>1.00-1.34</b> | <b>0.046</b>     | 1.00                            | 0.83-1.20        | 0.993            |
| Weekly                | <b>1.29</b>                       | <b>1.12-1.48</b> | <b>&lt;0.001</b> | 1.01                            | 0.87-1.17        | 0.927            | <b>1.19</b>                       | <b>1.02-1.39</b> | <b>0.028</b>     | 0.86                            | 0.72-1.04        | 0.121            |
| <b>Hobby</b>          |                                   |                  |                  |                                 |                  |                  |                                   |                  |                  |                                 |                  |                  |
| Monthly               | <b>0.63</b>                       | <b>0.58-0.68</b> | <b>&lt;0.001</b> | <b>0.76</b>                     | <b>0.70-0.83</b> | <b>&lt;0.001</b> | <b>0.74</b>                       | <b>0.67-0.80</b> | <b>&lt;0.001</b> | 0.98                            | 0.87-1.10        | 0.728            |
| Weekly                | <b>0.62</b>                       | <b>0.57-0.68</b> | <b>&lt;0.001</b> | <b>0.76</b>                     | <b>0.69-0.83</b> | <b>&lt;0.001</b> | <b>0.60</b>                       | <b>0.54-0.66</b> | <b>&lt;0.001</b> | <b>0.80</b>                     | <b>0.71-0.90</b> | <b>&lt;0.001</b> |
| <b>Club</b>           |                                   |                  |                  |                                 |                  |                  |                                   |                  |                  |                                 |                  |                  |
| Monthly               | <b>0.69</b>                       | <b>0.64-0.75</b> | <b>&lt;0.001</b> | <b>0.81</b>                     | <b>0.74-0.89</b> | <b>&lt;0.001</b> | <b>0.68</b>                       | <b>0.62-0.74</b> | <b>&lt;0.001</b> | <b>0.79</b>                     | <b>0.71-0.89</b> | <b>&lt;0.001</b> |
| Weekly                | <b>0.61</b>                       | <b>0.55-0.68</b> | <b>&lt;0.001</b> | <b>0.72</b>                     | <b>0.65-0.81</b> | <b>&lt;0.001</b> | <b>0.63</b>                       | <b>0.56-0.70</b> | <b>&lt;0.001</b> | <b>0.80</b>                     | <b>0.70-0.92</b> | <b>0.001</b>     |
| <b>Organization</b>   |                                   |                  |                  |                                 |                  |                  |                                   |                  |                  |                                 |                  |                  |
| Monthly               | <b>0.89</b>                       | <b>0.81-0.99</b> | <b>0.029</b>     | 0.95                            | 0.85-1.06        | 0.351            | <b>0.83</b>                       | <b>0.74-0.92</b> | <b>0.001</b>     | <b>0.85</b>                     | <b>0.74-0.98</b> | <b>0.021</b>     |
| Weekly                | 1.14                              | 0.97-1.35        | 0.111            | 1.13                            | 0.94-1.35        | 0.181            | 1.09                              | 0.91-1.29        | 0.354            | 1.03                            | 0.83-1.29        | 0.765            |

*Note.* For all activities, no engagement was the reference category. In both concurrent and longitudinal analyses, model 2 was adjusted for gender, race/ethnicity, education, age, marital status, employment status, household income, neighborhood safety, social network, and long-term conditions. Longitudinal model 2 was additionally adjusted for depression in the previous wave. Results weighted and based on 20 multiply imputed data sets.
